# Supplementary material for: Characterization of a Clp Protease Gene Regulator and the Reaeration Response in Mycobacterium tuberculosis
Source: PLoS One. 2010 Jul 16;5(7):e11622. doi: 10.1371/journal.pone.0011622 (PMC2905415; doi:10.1371/journal.pone.0011622)
Supplement: Table S1 — Hypoxia-repressed genes that are induced during M. tuberculosis reaeration. (0.08 MB XLS) [file pone.0011622.s001.xls]

## Sheet: Hypoxia-Repressed ReA Genes
Supplementary Table 1: Hypoxia-repressed genes which are induced during M. tuberculosis reaeration.
Rv #	Name	Gene Name	4dHyp	7dHyp	1hRA	4hRA	6hRA	12hRA	24hRA	4dHyp q	7dHyp q	1hRA q	4hRA q	6hRA q	12hRA q	24hRA q
Rv0003	recF	DNA replication and repair protein recF	-0.6708	-0.839	1.16174	0.330656	1.2656	1.54396	0.975844	6.31592	1.71955	0	13.6569	0	0.152649	0.0390798
Rv0005	gyrB	DNA gyrase subunit B gyrB	-0.9252	-1.2482	0.58802	0.494104	0.815542	1.31883	0.630667	0	0	1.40783	3.37847	0	0.111769	0.237413
Rv0006	gyrA	DNA gyrase subunit A gyrA	-1.718	-2.662	0.472323	0.80075	1.44206	1.42825	1.8939	0	0	0.302589	0.111065	0	0	0
Rv0010c	Rv0010c	conserved membrane protein	-0.569	-0.7516	0.203375	0.282875	0.966153	1.55833	0.458685	0.0198003	0.0702891	11.2291	2.59965	0	0	2.98138
Rv0014c	pknB	transmembrane serine/threonine-protein kinase B pknB	-1.207	-2.104	-0.212703	-0.0143147	1.00496	0.840711	0.97385	0	0	6.40245	42.539	0	0.635213	0
Rv0018c	pstP	serine/threonine phosphatase ppp	-0.2204	-2.0234	0.0442882	0.152875	0.43295	1.20217	0.3432	8.52747	0.0608004	36.9675	17.6173	3.04614	0.424444	5.4734
Rv0051	Rv0051	conserved membrane protein	-2.0318	-1.6038	0.356342	0.167133	0.118112	0.538525	1.36254	0.0106519	0.153395	2.68968	26.1741	9.88446	1.87601	0.0390798
Rv0058	dnaB	replicative DNA helicase dnaB	-2.155	-2.589	0.377992	0.596838	0.363971	0.273191	1.24897	0	0	1.40783	1.00039	3.04614	0.844682	0
Rv0069c	sdaA	L-serine dehydratase sdaA	-2.5676	-1.6608	0.50851	0.680229	-0.314242	1.67298	0.646139	0.0198003	0	0.830274	0	23.5289	0	0.491481
Rv0133	Rv0133	acetyltransferase	-1.4078	-1.4594	0.0204206	-0.318663	0.63495	1.98214	1.4198	0	0	37.9438	13.6569	1.09481	0	0
Rv0145	Rv0145	conserved hypothetical protein	-1.1832	-0.786	0.349816	0.256842	1.018	1.25467	1.1355	0.0106519	0.0608004	1.17012	22.1645	0.270283	0.160032	0
Rv0147	Rv0147	aldehyde dehydrogenase NAD-dependent	-1.0116	-0.9372	0.472917	0.61941	1.95398	1.93867	1.38567	0	0.0364408	0.444983	2.59965	0	0	0
Rv0148	Rv0148	short-chain type dehydrogenase/reductase	-1.73748	-1.34194	-0.0118412	0.394637	2.16433	2.35901	2.0555	0	0.0702891	42.945	6.73455	0	0.206695	0
Rv0164	TB18.5	conserved hypothetical protein	-1.075	-0.878	0.174288	0.616675	0.129924	0.307358	1.23524	0.090104	0	13.1173	0.355923	9.88446	5.39423	0
Rv0229c	Rv0229c	conserved membrane protein	-1.1108	-1.4906	0.188	0.596875	0.655333	0.923167	1.01767	0	0.0203035	18.6331	1.36714	0	0.286356	0
Rv0264c	Rv0264c	conserved hypothetical protein	-0.2452	-0.5952	0.312463	0.145754	0.454284	0.722559	1.00466	0.572367	0.495957	4.14216	26.1741	3.04614	4.10831	0
Rv0270	fadD2	fatty-acid-CoA ligase fadD2	-0.675	-1.6728	0.498937	0.927438	0.7805	0.646333	1.12783	0.0198003	0.347315	3.3679	0	0	2.52432	0
Rv0283	Rv0283	conserved membrane protein	-1.1124	-1.5552	-0.2	0.400875	1.1703	0.0529167	0.188	0	0	26.5037	11.6917	0	20.3124	12.3548
Rv0284	Rv0284	conserved membrane protein	-2.0426	-2.0748	0.0241549	-0.139499	0.188758	0.691691	1.81372	0	0	36.9675	34.5242	3.04614	3.23087	0
Rv0286	PPE4	PPE family protein	-1.8708	-1.8876	-0.171817	-0.00195833	0.129117	1.11658	1.07914	0	0	22.6855	42.539	14.5672	0.635213	0
Rv0290	Rv0290	conserved membrane protein	-2.119	-1.7816	-0.0502118	-0.308674	0.0392836	1.05253	0.578542	0	0	34.7236	8.20302	14.5672	0	0.237413
Rv0292	Rv0292	conserved membrane protein	-0.8774	-1.3974	-0.117587	-0.296961	0.0507778	0.528583	1.33686	0.0198003	0.773471	24.7647	6.73455	14.5672	0.34968	0
Rv0299	Rv0299	hypothetical protein	-1.5604	-1.6994	0.352703	0.364883	1.033	0.931167	1.08517	0	0	0.302589	11.6917	0	0.34968	0
Rv0300	Rv0300	conserved hypothetical protein	-1.5638	-1.0068	-0.283134	0.270815	0.452833	1.41517	0.986	0	0.0364408	14.9295	3.37847	0	0.152649	0
Rv0380c	Rv0380c	RNA methyltransferase	-0.6204	-0.6184	0.855725	0.695667	2.97124	3.24661	2.25353	0.0438163	0.347315	0	0.355923	0	0	0
Rv0381c	Rv0381c	hypothetical protein	-1.09156	-1.1632	0.602594	0.875515	3.02517	3.27433	2.32967	0	0.101481	0.0862895	0	0	0	0
Rv0382c	pyrE	orotate phosphoribosyltransferase pyrE	-0.5956	-0.7754	-0.360333	0.146375	2.40442	1.84233	1.74939	0.0438163	0.203951	6.40245	29.9115	0	0.160032	0
Rv0422c	thiD	phosphomethylpyrimidine kinase thiD	-1.3924	-2.2064	0.141217	0.402393	-0.145028	0.536167	1.96463	0	0	9.57804	8.20302	22.499	4.10831	0
Rv0423c	thiC	thiamine biosynthesis protein thiC	-0.9006	-0.7484	0.358031	0.478958	0.4521	0.893854	1.24049	0	0	2.21959	0.355923	1.09481	1.01133	0
Rv0429c	def	polypeptide deformylase def	-1.561	-1.1592	0.160717	0.205845	0.21745	0.376025	1.02583	0	0	7.91846	13.6569	3.04614	1.26652	0
Rv0470c	pcaA	mycolic acid synthase pcaA	-0.5144	-0.7722	0.58725	1.02	0.0600912	0.182525	0.2184	0.0198003	0.773471	4.14216	0	14.5672	1.56532	12.3548
Rv0475	hbhA	iron-regulated heparin binding hemagglutinin hbhA	0.0076	-0.652544	0.378875	0.358	1.26767	1.102	0.786167	25.3457	2.5417	2.68968	11.6917	0	0.521978	0.071375
Rv0483	lprQ	lipoprotein lprQ	-0.8942	-1.3704	0.814625	1.12395	1.70067	1.75221	1.18258	0	0.0608004	1.40783	0	0	0	0
Rv0486	mshA	mannosyltransferase	-0.3182	-1.254	0.571733	0.712125	0.641617	1.05117	0.896417	6.31592	0.0702891	0.692364	0	1.09481	0.286356	0.0390798
Rv0510	hemC	porphobilinogen deaminase hemC	-2.012	-2.75	0.488109	0.336042	0.118112	0.538025	1.34118	0	0	2.68968	15.6732	9.88446	1.56532	0
Rv0512	hemB	delta-aminolevulinic acid dehydratase hemB	-2.2412	-2.9692	0.0332912	-0.0763916	0.659784	1.77678	1.47058	0	0	33.363	35.8695	1.09481	0	0
Rv0540	Rv0540	conserved hypothetical protein	0.0394	-0.6188	-0.352483	-0.863172	0.0399245	-0.00964204	1.19772	23.651	1.71955	16.986	0	14.5672	29.2715	0.0390798
Rv0545c	pitA	low affinity inorganic phosphate transporter membrane protein pitA	-1.922	-1.6104	0.088375	0.425375	1.34267	1.57	1.29417	0	0	37.9438	13.6569	0	0.111769	0
Rv0557	pimB	mannosyltransferase pimB	-1.8214	-1.852	-0.231115	-0.431127	0.27995	1.2235	0.901037	0	0	16.986	4.21225	3.04614	0.206695	0.0390798
Rv0559c	Rv0559c	conserved secreted protein	-1.6744	-0.7834	0.252547	0.694203	1.04177	1.21468	1.38546	0	0	1.89534	0.0666069	0	0.206695	0
Rv0577	TB27.3	conserved hypothetical protein	0.3816	-0.7724	0.774031	0.66225	0.665	1.431	0.935833	0.572367	3.57562	0	0.111065	0.180939	0	0.0390798
Rv0589	mce2A	MCE-family protein mce2A	-0.7036	-0.9022	1.01219	1.3965	1.23033	2.13561	1.52083	0.0198003	0.495957	0	0	0	0.0803909	0
Rv0590	mce2B	MCE-family protein mce2B	-0.7872	-0.7568	0.93835	1.22962	1.49583	2.0925	1.8225	0.209738	1.71955	0	0	0	0	0
Rv0655	mkl	ribonucleotide-transport ATP-binding protein ABC transporter mkl	-1.1264	-1.5232	0.928375	0.994375	1.4115	0.950167	0.9505	0	0	0	0	0	0.34968	0
Rv0659c	Rv0659c	conserved hypothetical protein	-1.409	-1.689	-0.20825	0.05675	0.603867	1.47583	1.29173	0	0	13.1173	38.2802	0.270283	0.844682	0
Rv0660c	Rv0660c	conserved hypothetical protein	-1.2012	-1.4702	-0.15875	0.36475	0.117833	0.558667	1.58022	0	0	22.6855	13.6569	14.5672	0.635213	0
Rv0668	rpoC	DNA-directed RNA polymerase beta chain rpoC	-1.5056	-1.614	1.13229	1.33737	1.64117	1.94183	0.552958	0	0	0.23396	0	0	0.286356	2.98138
Rv0672	fadE8	acyl-CoA dehydrogenase fadE8	-0.293	-1.1286	-0.0323796	0.295615	2.14278	2.7142	2.2293	6.31592	2.5417	41.9716	19.8243	0	0	0
Rv0674	Rv0674	conserved hypothetical protein	-0.237	-0.6712	0.492249	0.258589	1.57133	1.81433	2.16167	8.52747	0.203951	0.830274	2.59965	0	0.635213	0
Rv0692	Rv0692	conserved hypothetical protein	-2.3638	-1.9364	0.564	1.34537	1.84833	1.33983	1.20667	0	0	0.23396	0	0	0.0803909	0
Rv0693	pqqE	coenzyme pqq synthesis protein E pqqE	-2.1124	-2.355	0.623251	0.60666	0.318881	-0.0653889	1.25863	0	0	0	0.111065	3.04614	29.2715	0
Rv0696	Rv0696	membrane sugar transferase	-2.4628	-2.3128	0.204483	0.78522	0.0257578	0.814025	1.82914	0	0	7.91846	0	14.5672	3.23087	0
Rv0702	rplD	50S ribosomal protein L4 rplD	-1.4564	-1.0422	1.27175	0.98125	0.624667	0.241	-0.341675	0	0	0	0	0.517166	5.39423	15.4429
Rv0704	rplB	50S ribosomal protein L2 rplB	-3.0616	-2.539	1.58279	1.08146	1.52433	1.11228	0.710944	0	0	0	0	0	0.160032	0.848953
Rv0705	rpsS	30S ribosomal protein S19 rpsS	-2.631	-2.1048	1.27763	1.1545	1.99592	1.81379	1.29125	0	0	0	0	0	0.160032	0
Rv0706	rplV	50S ribosomal protein L22 rplV	-1.5884	-1.8424	0.930525	1.19003	1.2695	0.562183	0.940389	0	0	0	0	0	0.22942	0
Rv0708	rplP	50S ribosomal protein L16 rplP	-2.4932	-1.627	0.549125	0.992375	0.780528	1.1084	0.806796	0	0	0.302589	0	0	0.152649	0.0390798
Rv0709	rpmC	50S ribosomal protein L29 rpmC	-2.5764	-1.7972	0.464	0.54025	1.52307	0.590333	1.10879	0	0	7.91846	9.64797	0	2.52432	0
Rv0710	rpsQ	30S ribosomal protein S17 rpsQ	-1.9816	-1.832	0.0788582	0.0436854	1.0676	-0.54165	0.489167	0	0	37.9438	38.2802	0	1.26652	1.2402
Rv0718	rpsH	30S ribosomal protein S8 rpsH	-1.7722	-1.1082	1.04958	0.799125	-0.0124	-0.164502	-0.340655	0	0.0364408	0	0.111065	27.6275	5.39423	16.6534
Rv0719	rplF	50S ribosomal protein L6 rplF	-2.1944	-1.3738	0.855875	1.08525	0.129208	-0.08	0.0503333	0	0	0	0	9.88446	29.2715	17.346
Rv0723	rplO	50S ribosomal protein L15 rplO	-2.3082	-1.8594	0.79825	1.14512	0.760236	0.459358	1.26489	0	0	0.131943	0	0	1.26652	0
Rv0732	secY	preprotein translocase secY	-1.1636	-1.255	0.904625	1.05825	0.238591	0.642068	0.918917	0	0	0.692364	0	3.04614	0.844682	0.071375
Rv0803	purL	phosphoribosylformylglycinamidine synthase II purL	-0.172	-1.5462	0.451781	1.03576	0.118112	0.208858	0.9035	8.52747	0.259255	3.3679	0	9.88446	1.87601	0.0390798
Rv0821c	phoY2	phosphate-transport system transcriptional regulator phoY2	-1.9828	-2.0356	-0.348813	0.194416	0.666117	0.291691	1.35467	0	0	1.40783	19.8243	2.18691	1.01133	0
Rv0822c	Rv0822c	conserved hypothetical protein	-2.1882	-2.9052	0.325109	0.713364	1.10117	0.641358	1.90882	0	0	2.68968	0.111065	0	1.87601	0
Rv0823c	Rv0823c	transcriptional regulator	-1.8994	-2.5304	1.42589	1.55973	1.89267	2.7075	2.24317	0	0	0.23396	0	0	0	0
Rv0824c	desA1	acyl-[acyl-carrier protein] desaturase desA1	-1.7298	-1.1338	1.01275	1.65863	2.37183	2.35567	1.84403	0	0.0364408	0.23396	0	0	0.111769	0
Rv0860	fadB	fatty-acid oxidation protein fadB	-0.6202	-1.1978	0.240913	0.287629	0.0265278	-0.6926	1.32667	0.0308319	0.773471	18.6331	17.6173	14.5672	3.23087	0.071375
Rv0861c	ercc3	DNA helicase ercc3	-0.8292	-1.8936	-0.00494312	-0.230372	0.118112	0.479025	1.27443	0.136641	0	43.7677	22.1645	9.88446	1.56532	0
Rv0868c	moaD2	molybdenum cofactor biosynthesis protein D 2 moaD2	-1.141	-0.8552	0.328387	0.024675	1.39545	0.198714	1.08986	0.0198003	0.0608004	4.14216	39.0397	0	3.23087	0.0390798
Rv0870c	Rv0870c	conserved membrane protein	-1.6488	-1.5196	-0.264125	0.209625	0.312056	0.8515	1.147	0	0	16.986	26.1741	0.413258	0.286356	0
Rv0896	gltA2	citrate synthase I gltA2	-1.2514	-1.5188	0.684	1.21938	0.771333	0.977833	1.56017	0	0.0702891	5.24832	0	0	0.0803909	0
Rv0902c	prrB	two component system sensor histidine kinase prrB	-0.1808	-1.1014	-0.202797	0.892478	0.39445	0.514689	1.08362	1.14444	1.71955	6.40245	0.771414	9.88446	0.111769	0
Rv0905	echA6	enoyl-CoA hydratase echA6	-1.0822	-1.553	-0.098875	0.462714	0.354617	1.36449	1.10222	0	0.0364408	34.7236	11.6917	3.04614	0.22942	0
Rv0905	echA6	enoyl-CoA hydratase echA6	-1.0822	-1.553	-0.098875	0.462714	0.354617	1.36449	1.10222	0	0.0364408	34.7236	11.6917	3.04614	0.22942	0
Rv0926c	Rv0926c	conserved hypothetical protein	0.004	-0.821	0.551758	1.04043	-0.113883	-0.7425	-0.120333	25.3457	0.0364408	0	0	26.1673	0.34968	21.5269
Rv1010	ksgA	dimethyladenosine transferase ksgA	-0.897	-1.6794	0.0332912	-0.00818964	0.118112	0.291358	1.05722	0	0.0702891	33.363	42.539	9.88446	0.521978	0
Rv1024	Rv1024	conserved membrane protein	-0.853	-1.0676	0.0457882	-0.0126741	0.207591	1.65347	1.345	0	0.0203035	34.7236	42.539	3.04614	0	0.0390798
Rv1061	Rv1061	conserved hypothetical protein	-1.4226	-0.6596	0.11373	0.206493	0.652784	1.83253	2.1823	0	0.0608004	35.9258	22.1645	1.09481	0	0
Rv1074c	fadA3	beta-ketoacyl CoA thiolase fadA3	-0.6682	-0.8338	-0.428209	0.382887	0.258117	1.146	0.670167	0	0.773471	16.986	9.64797	3.04614	0.160032	0.491481
Rv1080c	greA	transcription elongation factor greA	-1.8804	-1.7464	-0.706375	-0.097375	1.08333	1.53761	1.44583	0	0	7.91846	40.7065	0.270283	0.424444	0
Rv1095	phoH2	phosphate starvation-inducible protein phoH2	-1.5066	-1.878	0.10875	0.364125	1.39533	2.14	1.267	0	0	33.363	15.6732	0	0	0
Rv1098c	fum	fumarase fum	-1.637	-1.8112	-0.224642	-0.269562	0.118112	1.14403	0.50394	0.0106519	0.101481	9.57804	5.3589	9.88446	0.160032	0.330364
Rv1104	Rv1104	para-nitrobenzyl esterase	-0.6438	-0.8784	0.384892	0.213159	0.212284	0.363691	1.05235	0	0.773471	1.89534	11.6917	14.197	1.26652	0.0390798
Rv1106c	Rv1106c	cholesterol dehydrogenase	-0.5518	-1.46632	-0.165603	-0.550149	-0.0345498	-0.999896	1.0229	0.0106519	0.0364408	22.6855	0.0731619	27.6275	0.521978	0.117431
Rv1108c	xseA	exodeoxyribonuclease VII large subunit xseA	-1.3722	-1.8902	-0.125946	0.237266	0.199258	0.13854	1.21703	0	0	36.9675	26.1741	3.04614	0.34968	0
Rv1117	Rv1117	conserved hypothetical protein	-0.9322	-1.0552	0.153375	0.912625	1.56104	2.13153	1.75674	0	0	26.5037	0.111065	0	0.111769	0
Rv1133c	metE	5-methyltetrahydropteroyltriglutamate-homocysteine methyltransferase metE	-1.082	-1.7274	0.612355	0.07085	0.845569	1.205	1.18178	0	0.347315	2.21959	35.8695	0	1.26652	0
Rv1155	Rv1155	conserved hypothetical protein	-1.297	-1.0662	0.0502083	0.284125	0.182125	1.16617	1.23483	0	0	35.9258	13.6569	3.04614	0.152649	0
Rv1161	narG	respiratory nitrate reductase alpha chain narG	-0.988	-1.7914	0.239625	-0.0826875	1.278	0.846625	-0.207167	0.090104	0	7.91846	39.6143	0	0.111769	17.346
Rv1174c	TB8.4	low molecular weight T-cell antigen	-0.9148	-1.1016	0.14	0.6805	0.6365	1.37483	1.44017	0	0.495957	28.454	0.281621	0.106298	0.424444	0
Rv1185c	fadD21	fatty-acid-CoA ligase fadD21	-2.5806	-2.4988	0.396611	0.143127	0.0599245	0.148025	1.16279	0	0	0.23396	22.1645	14.5672	0.160032	0
Rv1186c	Rv1186c	conserved hypothetical protein	-1.3468	-1.4754	-0.898639	-0.957053	0.118112	0.434358	1.09317	0	0.0702891	0.692364	0.0731619	9.88446	7.21383	0.0390798
Rv1188	Rv1188	proline dehydrogenase	-0.4308	-1.0138	0.0612175	-0.226142	0.118112	0.380858	1.25407	0.090104	0.495957	26.5037	8.20302	9.88446	2.52432	0
Rv1194c	Rv1194c	conserved hypothetical protein	0.0518	-0.7084	0.352272	0.647375	0.326111	0.370191	1.12176	24.1907	0.773471	11.2291	1.36714	1.09481	1.01133	0.0390798
Rv1195	PE13	PE family protein	-1.5098	-2.5176	0.659875	1.09163	-0.241383	-0.681167	1.17232	0	0	0.830274	0	14.8506	3.23087	0.0390798
Rv1200	Rv1200	conserved membrane transport protein	-1.2218	-1.0814	-0.0862	0.172838	0.552333	1.09544	0.615	0	0	29.8071	26.1741	0	0.111769	2.30132
Rv1217c	Rv1217c	tetronasin-transport membrane protein ABC transporter	-0.3264	-0.7208	0.700719	0.276313	0.724833	0.5285	1.15467	0.572367	0.259255	0	13.6569	0	7.21383	0.237413
Rv1260	Rv1260	oxidoreductase	-1.1082	-0.6404	0.072	-0.03825	1.37233	1.15883	0.943683	0	4.87111	37.9438	42.3749	0	0.424444	0.848953
Rv1293	lysA	diaminopimelate decarboxylase lysA	-1.8434	-2.138	0.0332912	-0.0625166	0.122924	0.131291	1.20783	0	0	33.363	38.2802	9.88446	0.521978	0
Rv1295	thrC	threonine synthase thrC	-1.3298	-1.5446	-0.022125	0.00905439	0.605769	1.311	0.491667	0	0	42.4349	39.0397	0	0.0803909	1.2402
Rv1297	rho	transcription termination factor rho	-2.8524	-2.2468	0.746355	0.274788	2.2805	3.15733	1.75717	0	0	11.2291	27.873	0	0	0
Rv1298	rpmE	50S ribosomal protein L31 rpmE	-1.3954	-0.8148	0.510248	0.79045	1.82267	2.24683	1.01533	0.0308319	0.0702891	0.131943	0	0	0	0
Rv1299	prfA	peptide chain release factor 1 prfA	-1.9074	-0.93696	1.21287	1.19087	1.48783	1.50767	0.677	0	0.773471	0	0	0	0	0.201428
Rv1300	hemK	hypothetical protein hemK	-0.9492	-0.684	0.278288	0.293176	1.47233	1.474	1.3245	0	0.0364408	5.24832	19.8243	0	0.206695	0
Rv1302	rfe	undecapaprenyl-phosphate alpha-N-acetylglucosaminyltransferase rfe	-0.3396	-0.7478	0.596156	0.449357	1.24883	1.14983	0.878	0.572367	2.5417	0.692364	4.21225	0	0.22942	0.201428
Rv1303	Rv1303	conserved membrane protein	-0.5156	-0.7508	-0.11025	-0.075625	1.00033	0.7335	0.110333	0.209738	0	34.7236	40.4771	0	0.635213	17.346
Rv1305	atpE	ATP synthase C chain atpE	-1.0274	-1.7946	0.482625	0.75975	1.26275	0.919333	0.829833	0	0.0702891	0.23396	0	0	0.111769	0.848953
Rv1306	atpF	ATP synthase B chain atpF	-0.8334	-1.424	0.715875	0.87925	1.23383	0.680167	0.800833	0	0.0608004	0	0	0	1.01133	0.117431
Rv1307	atpH	ATP synthase delta chain atpH	-1.3202	-2.2334	0.611688	0.847325	1.4814	1.18617	0.9195	0	0	2.21959	0.355923	0	0.521978	0.117431
Rv1309	atpG	ATP synthase gamma chain atpG	-1.3728	-2.0168	0.0332912	0.150701	1.13867	0.0384907	0.556667	0	0.0203035	33.363	27.873	0	20.3124	1.2402
Rv1310	atpD	ATP synthase beta chain atpD	-2.1792	-2.0488	0.180288	0.344245	2.50937	1.70663	1.25933	0	0	14.9295	9.64797	0	0.424444	0
Rv1311	atpC	ATP synthase epsilon chain atpC	-2.1708	-1.8518	0.2045	0.308708	1.3405	1.08428	0.448019	0	0	20.7593	13.6569	0	0.160032	1.2402
Rv1312	Rv1312	conserved secreted protein	-1.5268	-1.5026	0.23023	0.259638	1.91333	0.980639	1.26167	0	0.0203035	16.986	8.20302	0	0.635213	0.0390798
Rv1322A	Rv1322A	conserved hypothetical protein	-1.9074	-1.8858	0.38562	0.507458	0.33375	0.933167	1.01417	0	0	1.40783	1.88847	0.0394775	0	0
Rv1323	fadA4	acetyl-CoA acetyltransferase fadA4	-0.9612	-2.0776	-0.132704	0.0854464	1.17017	1.18117	0.98625	0	0.101481	26.5037	29.9115	0	0	0
Rv1324	Rv1324	thioredoxin	-1.299	-1.7888	-0.163125	-0.008375	1.745	1.80217	0.93575	0	0	36.9675	42.539	0	0.160032	0
Rv1329c	dinG	ATP-dependent helicase dinG	-0.9272	-1.7154	0.0332912	-0.0803916	0.0982578	0.132873	1.02543	0	0.203951	33.363	35.8695	12.1857	0.424444	0
Rv1331	Rv1331	conserved hypothetical protein	-1.0038	-0.6226	-0.256625	0.53275	0.793	2.06613	1.9725	0.0198003	1.13947	16.986	13.6569	0	0.111769	0
Rv1334	Rv1334	conserved hypothetical protein	-0.303	-1.149	0.244125	1.059	1.8415	2.52333	1.813	19.9002	0.0203035	26.5037	0.281621	0	0.0803909	0
Rv1335	Rv1335	9.5 kda culture filtrate antigen cfp10a	-1.0738	-1.0346	1.06425	1.93775	2.165	2.146	1.77367	0	0	0	0	0	0	0
Rv1336	cysM	cysteine synthase B cysM	-1.1332	-2.0898	-0.0577118	0.768954	2.02861	2.14867	1.01117	0	0	36.9675	1.00039	0	0.286356	0
Rv1339	Rv1339	conserved hypothetical protein	-0.8502	-0.7588	0.492	1.03025	0.483833	0.996	0.339	0	0.0364408	1.89534	0	1.52027	1.26652	6.63691
Rv1341	Rv1341	conserved hypothetical protein	-0.7594	-0.982	-0.0756454	0.45575	0.623167	1.01382	0.927542	0	0.101481	34.7236	5.3589	0	0	0.0390798
Rv1360	Rv1360	oxidoreductase	-2.0458	-2.5314	-0.169146	0.548162	0.105924	0.234207	1.28791	0	0	13.1173	4.21225	9.88446	1.56532	0
Rv1386	PE15	PE family protein	-2.4644	-2.5786	0.047125	0.32975	1.38629	1.25654	0.825667	0	0	38.9346	3.37847	0	0	0.237413
Rv1387	PPE20	PPE family protein	-3.603	-3.102	0.549259	0.89525	1.65854	0.583858	1.09773	0	0	0	0	0	2.52432	0
Rv1410c	Rv1410c	aminoglycosides/tetracycline-transport membrane protein	-0.7896	-1.0204	0.227333	0.403021	0.0568042	-0.0688087	1.15355	0.0198003	0	28.454	13.6569	14.5672	29.2715	0
Rv1411c	lprG	lipoprotein lprG	-1.5376	-1.7956	0.424625	1.00925	0.13695	0.177857	1.51803	0	0	7.91846	0	9.88446	20.3124	0
Rv1418	lprH	lipoprotein lprH	-1.1062	-0.8742	0.189625	-0.057	0.950083	1.32717	1.01767	0	0.0364408	13.1173	34.5242	0	0.424444	0
Rv1422	Rv1422	conserved hypothetical protein	-0.6746	-1.551	0.191325	0.34625	1.709	0.85325	0.538875	0	0	11.2291	13.6569	0.413258	0.34968	1.6762
Rv1423	whiA	transcriptional regulator whiA	0.0466	-0.6744	0.261422	-0.170281	2.02053	0.962983	0.412813	23.1535	0.347315	6.40245	8.20302	0	0.22942	2.30132
Rv1425	Rv1425	conserved hypothetical protein	-1.1626	-0.8302	0.433	0.43975	1.42592	0.764452	0.954833	0.15615	0.203951	1.17012	0.111065	0	0.160032	0.0390798
Rv1438	tpi	triosephosphate isomerase tpi	-2.3166	-2.2004	0.5314	0.586031	0.118112	0.206358	1.10367	0	0	0.302589	0	9.88446	0.286356	0.0390798
Rv1442	bisC	biotin sulfoxide reductase bisC	-1.0118	-2.0136	-0.0107675	0.115424	-0.0667422	0.375025	1.13712	0	0.495957	43.1025	24.3177	27.6275	1.56532	0.0390798
Rv1451	ctaB	cytochrome C oxidase assembly factor ctaB	-0.4712	-0.594951	-0.142918	0.120352	0.174125	1.02272	1.133	0.0198003	0.495957	20.7593	17.6173	9.88446	0.424444	0.0390798
Rv1463	Rv1463	ABC transporter ATP-binding protein	-0.2584	-0.6864	0.396125	0.88175	1.30917	1.77633	1.139	0.368873	0.153395	13.1173	0	0	0	0
Rv1464	csd	cysteine desulfurase csd	-0.934	-1.1058	-0.0877275	0.553512	1.75117	2.50983	1.67533	0.0308319	0.0702891	29.8071	9.64797	0	0	0
Rv1465	Rv1465	nitrogen fixation related protein	-1.3904	-1.305	0.0245019	0.0104926	1.49104	1.91806	1.41783	0	0.203951	36.9675	39.0397	0	0.111769	0
Rv1466	Rv1466	conserved hypothetical protein	-1.23	-0.8744	-0.155962	-0.20645	1.96622	2.43462	1.70117	0	0.773471	29.8071	33.1445	0	0	0
Rv1475c	acn	iron-regulated aconitate hydratase acn	-2.0468	-1.8542	0.178	0.8715	1.62793	1.09715	1.585	0	0	34.7236	6.73455	0	0.34968	0
Rv1485	hemZ	ferrochelatase hemZ	-0.8954	-1.4302	-0.1375	0.128792	0.118112	-0.437972	1.07904	0	0	29.8071	26.1741	9.88446	19.1943	0.0390798
Rv1531	Rv1531	conserved hypothetical protein	-0.531156	-0.61052	0.502554	0.762475	-1.0806	0.851691	1.30652	0.0438163	3.57562	0.830274	1.36714	0.413258	3.23087	0
Rv1534	Rv1534	transcriptional regulator	-1.8674	-1.4476	1.28589	1.25348	0.170591	0.613191	1.32988	0.209738	0	0	0	3.04614	1.87601	0
Rv1536	ileS	isoleucyl-tRNA synthetase ileS	-1.6284	-1.4964	0.242016	0.805625	1.33306	1.33617	1.5281	0	0	14.9295	0.355923	0	0	0
Rv1546	Rv1546	conserved hypothetical protein	-1.0948	-0.6354	-0.548719	-0.456188	0.16745	-0.203079	1.08367	0	0.773471	4.14216	6.73455	3.04614	24.0982	0.0390798
Rv1561	Rv1561	conserved hypothetical protein	-1.22	-1.107	0.46925	0.747	0.412924	0.624691	1.28686	0	0	1.40783	0.111065	3.04614	2.52432	0
Rv1564c	treX	maltooligosyltrehalose synthase treX	-1.19813	-2.3646	0.31109	0.297668	-0.0284088	0.236276	1.54453	0	0	4.14216	9.64797	27.6275	1.26652	0
Rv1565c	Rv1565c	conserved membrane protein	-1.806	-2.0938	-0.021099	0.381063	-0.07615	0.304525	1.22003	0	0	41.2276	3.37847	27.6275	4.10831	0.0390798
Rv1569	bioF1	8-amino-7-oxononanoate synthase bioF1	-1.288	-2.191	-0.0450175	-0.0922994	0.118112	0.31054	1.22088	0	0	36.9675	33.1445	9.88446	3.23087	0.0390798
Rv1596	nadC	nicotinate-nucleotide pyrophosphatase nadC	-1.5044	-1.9278	0.274355	0.266016	1.17153	1.93562	1.58683	0	0	14.9295	5.3589	0	0.0803909	0
Rv1601	hisB	imidazole glycerol-phosphate dehydratase hisB	0.4238	-0.6682	0.275855	0.33475	0.36645	1.16277	0.29175	0.802996	2.5417	9.57804	11.6917	9.88446	0.22942	8.41858
Rv1665	pks11	chalcone synthase pks11	-0.615	-0.6162	0.0645833	0.698175	1.13683	1.91917	1.30856	0.15615	0.773471	35.9258	0.0666069	0	0.206695	0
Rv1693	Rv1693	conserved hypothetical protein	-0.8934	-0.7534	-0.05375	0.221625	0.125804	0.756981	1.15729	0	0.0203035	40.517	22.1645	9.88446	0.111769	0.0390798
Rv1717	Rv1717	conserved hypothetical protein	-0.7356	-0.672	1.125	0.53425	2.87883	2.01367	2.00567	0.209738	3.57562	0.131943	15.6732	0	0.521978	0.0390798
Rv1718	Rv1718	conserved hypothetical protein	-0.194	-0.7378	0.834244	0.466982	2.32924	1.88378	1.50606	6.31592	2.5417	0.0862895	11.6917	0	0.111769	0.0390798
Rv1728c	Rv1728c	conserved hypothetical protein	-1.2892	-0.9666	0.370821	0.63775	0.102038	1.82241	1.03348	0	0.0364408	1.40783	0.175732	12.1857	0.286356	0.0390798
Rv1746	pknF	anchored-membrane serine/threonine-protein kinase pknF	-0.5414	-1.0632	0.0239583	-0.168075	0.0589502	1.03487	0.457583	0.0198003	0.259255	41.9716	26.1741	14.5672	0.206695	1.6762
Rv1768	PE_PGRS31	PE-PGRS family protein	-0.2142	-0.639514	0.109627	-0.0427666	0.142069	1.054	0.364727	1.52681	0.259255	20.7593	40.0388	12.1857	0.111769	4.08595
Rv1770	Rv1770	conserved hypothetical protein	0.3428	-0.8768	-0.172212	-0.12844	1.89037	-0.0428333	-0.0773148	2.32189	1.71955	31.1901	26.1741	0	29.2715	22.9758
Rv1774	Rv1774	oxidoreductase	-0.3296	-0.6656	0.75986	1.27332	1.8595	2.59317	2.415	1.14444	4.87111	4.14216	0.175732	0	0	0
Rv1794	Rv1794	conserved hypothetical protein	-1.0984	-1.3418	0.64251	0.633021	0.754333	1.37367	1.25833	0	0.347315	0.131943	5.3589	0	0.111769	0
Rv1796	mycP5	proline rich membrane-anchored mycosin mycP5	-1.798	-1.6482	-0.602125	-0.127875	0.669167	1.19617	0.947333	0	0	9.57804	39.6143	0	0.206695	0.237413
Rv1797	Rv1797	conserved hypothetical protein	-1.5252	-1.6796	0.198833	0.158625	1.03163	1.66079	1.31733	0	0	5.24832	19.8243	0	0	0
Rv1811	mgtC	Mg2+ transport ATPase C mgtC	-1.0834	-0.6864	-0.0242118	-0.297137	1.58903	1.71984	1.1484	0	3.57562	42.4349	1.88847	0	0.111769	0.237413
Rv1816	Rv1816	transcriptional regulator	-0.9622	-0.6426	-0.442255	-0.466212	0.529875	1.69983	0.306352	0	0.0702891	3.3679	0.771414	2.18691	0.111769	8.41858
Rv1820	ilvG	acetolactate synthase ilvG	-0.2298	-0.728	0.0363893	-0.11975	0.980639	0.93475	1.32229	4.50169	3.57562	40.517	34.5242	0	1.87601	0
Rv1821	secA2	preprotein translocase ATPase secA2	-0.7724	-1.0242	0.2445	0.452639	1.34008	1.18796	0.620667	0	0.101481	6.40245	0.175732	0	0.206695	0.491481
Rv1828	Rv1828	conserved hypothetical protein	-0.5628	-0.8278	0.452875	1.04838	0.974667	1.609	1.30233	0	1.71955	1.40783	0	0	0.0803909	0
Rv1829	Rv1829	conserved hypothetical protein	-1.0746	-0.706	-0.05	0.512875	0.686095	1.36217	0.942083	0	1.13947	39.6312	3.37847	0	0.0803909	0
Rv1836c	Rv1836c	conserved hypothetical protein	-1.524	-2.949	0.0956549	-0.101392	0.118112	0.267525	1.22756	0	0.203951	22.6855	34.5242	9.88446	1.26652	0
Rv1837c	glcB	malate synthase G glcB	-0.352	-0.8228	0.467868	0.053625	0.953067	1.11517	1.15933	0.136641	0.773471	9.57804	39.0397	0	0.286356	0
Rv1842c	Rv1842c	conserved membrane protein	-0.8378	-1.4686	-0.249492	0.0645461	1.08481	0.766905	0.915125	0	0.203951	4.14216	33.1445	0	0.635213	0.0390798
Rv1844c	gnd1	6-phosphogluconate dehydrogenase gnd1	-0.3194	-0.9162	0.0789132	-0.432444	1.08967	0.861407	0.949667	0.209738	0.101481	22.6855	4.21225	0	0.286356	0.0390798
Rv1846c	blaI	transcriptional regulator	-0.2558	-0.824	0.02475	0.539375	0.493667	1.39767	1.02883	0.802996	0.773471	41.2276	2.59965	1.09481	0.160032	0
Rv1870c	Rv1870c	conserved hypothetical protein	-3.3606	-3.0436	-0.143281	0.495125	0.455833	0.90225	1.0105	0	0	22.6855	0.355923	1.52027	0.22942	0
Rv1887	Rv1887	hypothetical protein	-0.7796	-1.25	0.394708	0.385396	1.05801	0.541	0.5935	0.0106519	0.203951	11.2291	8.20302	0	0	0.619108
Rv1904	Rv1904	conserved hypothetical protein	-0.345965	-0.74606	0.132	0.8375	0.9053	1.35523	1.39983	4.50169	0.495957	28.454	0.175732	0	0.152649	0
Rv1925	fadD31	acyl-CoA ligase fadD31	-1.147	-1.2196	0.613625	1.165	0.729833	1.36283	1.15033	0	0	0.444983	0	0	0.111769	0
Rv1987	Rv1987	chitinase	-1.3662	-1.2416	0.423458	0.666625	1.13844	1.04258	1.43111	0	0.0364408	1.89534	0	0	0.286356	0
Rv2009	Rv2009	conserved hypothetical protein	-2.0094	-1.6458	0.4265	0.67275	0.474167	1.09417	0.526	0	0.0364408	0.302589	0.111065	1.52027	0.34968	1.6762
Rv2042c	Rv2042c	conserved hypothetical protein	-1.2304	-1.2648	0.00699059	0.0962579	0.229777	0.259083	1.04462	0	0	42.4349	27.873	0.180939	1.87601	0.0390798
Rv2043c	pncA	pyrazinamidase/nicotinamidas pncA	-0.5872	-0.652	0.337375	0.714788	0.487784	1.31378	1.11625	0.0438163	0.495957	0.23396	0	1.52027	0.160032	0
Rv2045c	lipT	carboxylesterase lipT	-0.2056	-1.66667	0.106717	0.0561346	0.403117	0.486643	1.11573	1.52681	0.203951	14.9295	31.4892	1.52027	9.30021	0.0390798
Rv2054	Rv2054	conserved hypothetical protein	-0.7298	-0.825	0.0503425	0.507034	0.103758	0.105109	1.26293	0	0	31.1901	0.0666069	12.1857	3.23087	0
Rv2067c	Rv2067c	conserved hypothetical protein	-1.345	-0.6738	0.321625	0.655	1.06429	1.55183	1.16157	0	0.773471	11.2291	0	0	0.111769	0
Rv2068c	blaC	class A beta-lactamase blaC	-0.5628	-0.7754	0.19225	0.3715	0.6745	1.287	1.1285	0.0198003	0.495957	18.6331	1.36714	0	1.26652	0.0390798
Rv2093c	tatC	SEC-independent protein translocase transmembrane protein tatC	-1.4276	-1.5644	0.253958	0.673	0.694639	1.16166	0.998667	0	0	7.91846	2.59965	0	0	0
Rv2094c	tatA	SEC-independent protein translocase membrane-bound protein tatA	-1.4214	-1.3336	0.167125	0.876375	0.915792	2.08933	1.98356	0	0.0203035	24.7647	0.0666069	0	0	0
Rv2104c	Rv2104c	conserved hypothetical protein	-1.0438	-0.9418	-0.01375	0.132875	1.10183	1.82417	1.5725	0.209738	0.347315	43.3183	33.1445	0	0	0
Rv2124c	metH	5-methyltetrahydrofolate-homocystein methyltransferase metH	-0.9446	-1.1006	0.21703	0.0677277	0.122091	0.407525	1.10347	0.0198003	0.0608004	18.6331	33.1445	9.88446	1.87601	0
Rv2145c	wag31	hypothetical protein wag31	-1.0956	-0.9848	0.612375	1.08062	0.689433	1.54533	1.00815	0	0	0.131943	0	0	0.152649	0.0390798
Rv2152c	murC	UDP-N-acetylmuramate-alanine ligase murC	-0.5444	-2.3436	0.401896	0.12025	0.6947	1.00368	0.498354	0.0198003	0.0608004	0.302589	27.873	0	0	0.330364
Rv2156c	murX	phospho-N-acetylmuramoyl-pentappeptidetransferase murX	-0.96	-1.5854	0.297934	0.176125	0.954833	1.21483	1.095	0.0198003	0.0608004	2.68968	19.8243	0	0	0
Rv2157c	murF	UDP-N-acetylmuramoylalanyl-D-glutamyl-2,6-diaminopimelate-D-alanyl-D-alanyl ligase murF	-0.3284	-1.3898	0.383	0.159055	1.41503	2.11383	1.816	0.572367	0.347315	3.3679	17.6173	0	0	0
Rv2161c	Rv2161c	conserved hypothetical protein	-0.445	-1.174	0.4315	0.698875	1.29978	2.2602	1.42433	0.090104	1.13947	9.57804	0.111065	0	0.111769	0
Rv2172c	Rv2172c	conserved hypothetical protein	-1.3166	-1.4812	0.00666321	0.252656	0.697042	1.02083	0.3295	0	0	42.4349	11.6917	0.0394775	0.424444	4.08595
Rv2178c	aroG	3-deoxy-D-arabino-heptulosonate 7-phosphate synthase aroG	-1.2062	-1.1598	0.526375	1.14712	-0.163578	0.93715	0.3885	0	0	2.68968	0	21.3844	0.0803909	8.41858
Rv2184c	Rv2184c	conserved hypothetical protein	-0.9234	-0.866	0.109796	0.131326	0.084	1.54396	1.07467	0	0.259255	18.6331	29.9115	14.5672	0.160032	0
Rv2196	qcrB	ubiquinol-cytochrome C reductase qcrB cytochrome B subunit	-1.7412	-2.296	0.09	0.2355	0.370284	0.866683	1.09	0	0	36.9675	17.6173	1.52027	1.87601	0
Rv2213	pepB	aminopeptidase pepB	-0.2284	-0.9322	0.394962	0.15174	0.275091	0.261707	1.08718	6.31592	0.495957	0	22.1645	3.04614	1.87601	0
Rv2220	glnA1	glutamine synthetase glnA1	-0.9746	-1.5178	0.0332912	0.146185	0.616924	0.103525	1.18668	0.0198003	0	33.363	19.8243	3.04614	4.10831	0.0390798
Rv2223c	Rv2223c	exported protease	-1.174	-1.4654	0.31195	-0.09205	0.762117	1.24312	-0.264717	0	0.153395	1.17012	40.4771	2.18691	0.0803909	17.9624
Rv2224c	Rv2224c	exported protease	-0.531	-1.0912	-0.188328	0.102625	0.80995	1.20903	1.05783	0.0198003	0.495957	16.986	34.5242	1.52027	0.111769	0.071375
Rv2247	accD6	acetyl/propionyl-CoA carboxylase beta subunit accD6	-0.8674	-1.15034	0.97975	1.46425	2.61886	3.12117	1.6155	0.0438163	0.259255	0	0	0	0	0
Rv2248	Rv2248	conserved hypothetical protein	-0.702	-0.897	0.536427	0.813837	0.944195	0.909858	2.28967	0.136641	0.0702891	0.131943	0	1.09481	1.87601	0
Rv2289	cdh	cdp-diacylglycerol pyrophosphatase cdh	-1.3838	-1.5066	0.411375	0.559125	0.155424	0.294525	1.05438	0	0	7.91846	0.281621	9.88446	1.01133	0
Rv2290	lppO	lipoprotein lppO	-0.0186	-0.8704	0.20225	0.154375	0.632167	1.05567	0.275146	22.5603	1.13947	11.2291	22.1645	0	0	8.41858
Rv2297	Rv2297	hypothetical protein	-0.5724	-1.2448	1.22562	1.004	1.18633	1.23242	0.442685	0.0438163	0	0	0	0	0.0803909	2.98138
Rv2321c	rocD2	ornithine aminotransferase rocD2	0.5114	-0.867	0.438406	0.225517	0.35595	1.07033	0.916667	0.136641	0.259255	0.131943	9.64797	1.52027	0.22942	0.0390798
Rv2326c	Rv2326c	transmembrane ATP-binding protein ABC transorter	-1.3652	-2.496	-0.128075	0.0545089	0.34695	0.217525	1.01967	0	0.0364408	13.1173	34.5242	1.52027	5.39423	0.0390798
Rv2334	cysK1	cysteine synthase A cysK1	-1.702	-2.1886	0.474899	0.203525	0.396444	1.02597	1.0977	0	0	0	26.1741	0	0.206695	0.117431
Rv2392	cysH	3-phosphoadenosine 5-phosphosulfate reductase cysH	-1.0882	-1.4048	1.02775	0.731375	1.02294	0.634595	-0.1925	0	0	0	0.281621	0	2.52432	20.3314
Rv2425c	Rv2425c	conserved hypothetical protein	-1.5096	-1.9448	-0.098238	-0.176907	0.118112	-0.207809	1.18435	0.0198003	0.259255	31.1901	17.6173	9.88446	29.1063	0.0390798
Rv2436	rbsK	ribokinase rbsK	-0.221	-1.4384	-0.106006	0.495225	0.202784	0.504944	1.04367	16.742	0.259255	31.1901	0.111065	3.04614	5.39423	0
Rv2445c	ndkA	nucleoside diphosphate kinase ndkA	-0.6084	-0.63628	0.300125	0.234625	-0.284409	0.290358	1.14478	1.14444	0.153395	1.40783	22.1645	24.2369	1.26652	0.0390798
Rv2446c	Rv2446c	conserved membrane protein	-0.9514	-0.6114	-0.276508	0.0350595	0.164471	0.178358	1.24972	0.0198003	0.495957	7.91846	39.0397	3.04614	3.23087	0.0390798
Rv2457c	clpX	ATP-dependent clp protease ATP-binding subunit clpX	-1.4504	-1.73	0.539375	1.21263	0.9435	0.958667	1.03217	0	0.0203035	2.21959	0	0	0.0803909	0.0390798
Rv2462c	tig	trigger factor protein tig	-1.6976	-1.3806	1.00875	1.10175	2.30733	2.19033	1.35762	0	0	0	0	0	0.0803909	0
Rv2463	lipP	esterase/lipase lipP	-1.4552	-1.6174	0.625188	1.09725	0.0692578	0.836167	0.452167	0	0	0.131943	0	14.5672	0.635213	2.98138
Rv2482c	plsB2	glycerol-3-phosphate acyltransferase plsB2	-0.0624	-1.292	0.300196	0.128633	0.118112	0.394191	1.08207	18.5284	0.773471	5.24832	17.6173	9.88446	1.01133	0
Rv2524c	fas	fatty-acid synthase fas	-2.3642	-1.8944	-0.178783	-0.384918	1.3215	1.03456	1.63658	0	0	18.6331	0.355923	0	1.56532	0
Rv2525c	Rv2525c	conserved hypothetical protein	-0.465	-0.5986	0.48225	0.671375	-0.0611833	0.350525	1.1625	0.802996	0.259255	0.131943	0	27.6275	1.26652	0.0390798
Rv2535c	pepQ	cytoplasmic peptidase pepQ	-0.2118	-0.8354	-0.33625	-0.441875	0.411283	1.26633	1.32933	3.37732	1.13947	18.6331	2.59965	1.52027	0.635213	0.0390798
Rv2537c	aroD	3-dehydroquinate dehydratase aroD	-1.644	-1.9806	0.512433	0.803932	0.973583	2.06146	1.15923	0	0	0.302589	0	0.0746586	0	0.0390798
Rv2589	gabT	4-aminobutyrate aminotransferase gabT	0.4126	-0.59745	0.151502	0.210383	0.304284	0.866208	1.21088	0	2.5417	11.2291	9.64797	9.88446	0.34968	0.0390798
Rv2611c	Rv2611c	acyltransferase	-0.7592	-0.74	1.01422	0.697875	1.41797	1.3055	1.06883	0	0.259255	1.40783	5.3589	0	0.424444	0.237413
Rv2680	Rv2680	conserved hypothetical protein	-1.5158	-1.4004	0.318723	0.55119	0.915417	1.56631	1.06926	0	0	0.692364	1.00039	0	0.521978	0.071375
Rv2682c	dxs1	1-deoxy-D-xylulose 5-phosphate synthase dxs1	-1.454	-2.0616	0.48297	-0.017125	0.830667	1.15338	1.01394	0	0	0.830274	42.539	0	0.0803909	0
Rv2696c	Rv2696c	conserved alanine, glycine and valine rich protein	-0.7622	-0.9666	0.28322	0.661979	1.3928	0.802011	0.959833	0	0	2.68968	0	0	2.52432	0.201428
Rv2697c	dut	deoxyuridine 5-triphosphate nucleotidohydrolase dut	-1.522	-1.216	0.450809	0.804388	0.66295	1.66576	2.01978	0	0	2.68968	0.0666069	1.09481	0.160032	0
Rv2715	Rv2715	hydrolase	-0.2554	-0.8304	0.516375	0.81975	1.70917	1.8945	1.26533	4.50169	0.0608004	2.68968	0	0	0.0803909	0
Rv2720	lexA	repressor lexA	-1.5592	-1.883	0.596	0.65475	0.430607	1.40183	1.33217	0	0	0.131943	0.111065	3.04614	0.0803909	0
Rv2733c	Rv2733c	conserved alanine and arginine rich protein	-0.6942	-1.35418	0.385637	0.0930442	0.520617	0.212207	1.01786	0.0198003	0.773471	1.17012	31.4892	3.04614	1.26652	0.0390798
Rv2735c	Rv2735c	conserved hypothetical protein	-1.18542	-1.4142	-0.259657	0.119136	0.121258	0.512525	1.24394	0	0.0364408	2.21959	26.1741	9.88446	1.87601	0
Rv2778c	Rv2778c	conserved hypothetical protein	-1.4712	-1.2146	0.137625	0.54525	1.07983	0.99	0.807667	0	0	26.5037	0.281621	0	0.424444	0.0390798
Rv2781c	Rv2781c	alanine rich oxidoreductase	0.5538	-1.0452	-0.328443	-0.29666	0.870617	1.81175	0.760519	2.32189	0.773471	0.692364	3.37847	1.52027	0.111769	0.071375
Rv2783c	gpsI	bifunctional polyribonucleotide nucleotidyltransferase gpsI	-0.8662	-1.3334	0.95475	0.9775	1.28445	1.45942	0.524417	0	0.0203035	0	0	0	0.111769	0.619108
Rv2789c	fadE21	acyl-CoA dehydrogenase fadE21	-1.884	-2.9812	0.424502	0.554468	-0.0965755	0.684858	1.72801	0	0	6.40245	3.37847	27.6275	1.87601	0
Rv2790c	ltp1	lipid-transfer protein ltp1	-1.3956	-2.1686	0.452049	0.417913	0.328758	0.324691	1.03598	0	0	0.444983	2.59965	3.04614	0.844682	0
Rv2791c	Rv2791c	transposase	-1.244	-1.7008	0.0332912	0.0186084	0.333575	0.234929	1.02873	0	0	33.363	38.2802	0	9.30021	0
Rv2792c	Rv2792c	resolvase	-1.502	-1.41	0.0754206	-0.0640166	0.932663	1.42267	1.177	0	0.0608004	22.6855	38.2802	0	0.111769	0
Rv2818c	Rv2818c	hypothetical protein	-0.8068	-0.9124	-0.184236	0.0536771	1.10223	0.735556	0.810444	0	2.5417	24.7647	38.2802	0	0.34968	0.330364
Rv2837c	Rv2837c	conserved hypothetical protein	-1.1966	-0.9114	0.90425	1.20725	2.3615	3.28117	1.73667	0	0	0	0	0	0	0
Rv2838c	rbfA	ribosome-binding factor A rbfA	-1.2198	-1.4406	1.27425	1.84425	2.55383	3.07021	2.446	0	0	0	0	0	0	0
Rv2839c	infB	translation initiation factor IF-2 infB	-0.813	-1.0666	0.84875	1.11963	2.32817	2.7625	2.09742	0	0.259255	0.444983	0	0	0	0
Rv2840c	Rv2840c	conserved hypothetical protein	-0.8046	-1.1514	0.42639	0.329484	1.05056	1.53893	0.452167	0	0.101481	0	15.6732	0	0.152649	5.4734
Rv2841c	nusA	N utilization substance protein A nusA	-0.7824	-0.7982	0.513125	1.22188	1.22242	2.0601	1.51717	0.0308319	0.773471	0.830274	0	0	0.0803909	0
Rv2846c	efpA	membrane efflux protein efpA	-2.5726	-2.1828	0.390818	1.56238	0.0438611	0.9965	0.389528	0	0	4.14216	0	14.5672	0.424444	5.4734
Rv2857c	Rv2857c	short-chain type dehydrogenase/reductase	-1.2906	-1.2158	-0.25577	-0.115792	0.270784	0.475025	1.08319	0	0.0608004	6.40245	29.9115	3.04614	3.23087	0.0390798
Rv2858c	aldC	aldehyde dehydrogenase aldC	-0.8146	-1.0656	-0.336624	0.501684	0.192778	1.23383	0.755185	0	0.347315	1.89534	2.59965	12.1857	0.111769	0.117431
Rv2861c	mapB	methionine aminopeptidase mapB	-1.8268	-2.0146	0.245375	0.556859	0.177091	0.390525	1.08322	0	0	11.2291	0.538361	3.04614	1.26652	0
Rv2868c	gcpE	4-hydroxy-3-methylbut-2-en-1-yl diphosphate synthase gcpE	-0.3906	-0.6872	-0.118375	0.32925	1.02163	1.24217	0.872	0.090104	0.495957	33.363	11.6917	0	0.111769	0.0390798
Rv2888c	amiC	amidase amiC	-1.1668	-1.043	0.600688	0.446375	1.46802	0.989845	0.939222	0	0.0203035	1.89534	1.36714	0	0.111769	0.0390798
Rv2894c	xerC	integrase xerC	-1.127	-1.938	0.291978	0.150094	0.381617	1.15784	0.441907	0	0	4.14216	27.873	9.88446	0.111769	2.30132
Rv2896c	Rv2896c	conserved hypothetical protein	0.0648667	-0.62384	0.386483	0.764683	0.706917	1.12155	0.385233	23.1535	0.347315	4.14216	0	0	0.152649	8.41858
Rv2905	lppW	alanine rich lipoprotein lppW	-1.627	-2.2352	0.363564	0.0373467	0.118112	0.131291	1.18358	0	0	3.3679	38.2802	9.88446	0.521978	0
Rv2918c	glnD	protein-pii uridylyltransferase glnD	-1.0224	-2.0912	1.04744	1.00375	1.43063	1.52458	0.973167	0.15615	0.0203035	0	0	0	0.424444	0.0390798
Rv2920c	amt	ammonium-transport membrane protein amt	-1.254	-1.4752	0.567625	0.867875	1.76383	1.20139	0.445667	0.0106519	0	1.89534	0	0	0.424444	1.6762
Rv2928	tesA	thioesterase tesA	-1.3118	-0.600956	0.582833	1.07116	0.549833	0.905733	1.23317	0	3.57562	1.17012	0	3.04614	1.01133	0.0390798
Rv2930	fadD26	fatty-acid-CoA ligase fadD26	-1.7608	-1.8504	0.543192	1.71063	0.977667	1.87283	1.458	0	0	5.24832	0	0	0	0
Rv2931	ppsA	phenolpthiocerol synthesis type-I polyketide synthase ppsA	-2.355	-2.538	-0.317954	0.795341	1.09267	0.909839	1.18919	0	0	4.14216	0.0666069	0	1.87601	0
Rv2932	ppsB	phenolpthiocerol synthesis type-I polyketide synthase ppsB	-0.9982	-1.4784	0.0962995	-0.167815	0.271258	0.811125	1.02533	0	0	20.7593	31.4892	3.04614	0.635213	0
Rv2933	ppsC	phenolpthiocerol synthesis type-I polyketide synthase ppsC	-0.996	-1.9856	-0.0750045	0.171187	0.553784	1.25546	1.25683	0	0	34.7236	29.9115	2.18691	0	0
Rv2940c	mas	multifunctional mycocerosic acid synthase membrane-associated mas	-1.8376	-1.8054	0.533854	0.922286	1.82427	0.630525	0.842167	0	0	0.302589	0	0	1.56532	0
Rv2941	fadD28	fatty-acid-CoA ligase fadD28	-0.7723	-1.20272	0.461	1.005	0.791528	0.987833	1.50933	0	0.0608004	5.24832	0	0	0.521978	0
Rv2948c	fadD22	fatty-acid-CoA ligase fadD22	-3.0428	-2.9524	-0.076925	0.685727	0.44645	0.251373	1.32728	0	0	34.7236	0	1.52027	1.87601	0
Rv2953	Rv2953	conserved hypothetical protein	-1.1782	-2.4276	0.114267	0.1645	0.327298	0.226088	1.17657	0	0.0203035	14.9295	22.1645	1.52027	0.521978	0
Rv2967c	pca	pyruvate carboxylase pca	-1.5094	-1.833	0.0332912	-0.0700166	1.67613	0.479921	0.18625	0	0	33.363	37.1421	0	1.87601	14.1131
Rv2971	Rv2971	oxidoreductase	-0.6194	-0.7526	0.463375	1.03525	0.572528	1.05353	1.18992	0.0308319	0.259255	11.2291	0.111065	0.517166	0.111769	0
Rv2986c	hupB	histone-like DNA-binding protein hupB	-1.3836	-1.5396	1.05763	1.741	2.13417	2.536	2.28133	0	0.101481	0	0	0	0	0
Rv2987c	leuD	3-isopropylmalate dehydratase small subunit leuD	-1.503	-1.4576	0.95948	1.30875	2.07894	2.05151	2.0085	0	0	0	0	0	0.160032	0
Rv3001c	ilvC	ketol-acid reductoisomerase ilvC	-1.5052	-1.702	0.518302	0.962719	0.113591	0.238207	1.25667	0	0.0608004	1.40783	0	9.88446	1.56532	0
Rv3009c	gatB	glutamyl-tRNA(gln) amidotransferase subunit B gatB	-0.245	-0.9086	0.388125	0.407875	0.181556	1.20572	1.24378	1.14444	3.57562	9.57804	6.73455	9.88446	0.111769	0
Rv3043c	ctaD	cytochrome C oxidase polypeptide I ctaD	-2.1564	-1.965	0.54445	0.834	0.815333	1.58847	1.61792	0	0.0364408	0.692364	0.0666069	0.180939	0	0
Rv3044	fecB	Fe(III)-dicitrate-binding periplasmic lipoprotein fecB	-0.8346	-1.1186	0.163042	0.224059	-0.0713624	0.174525	1.0405	0.0198003	0.773471	20.7593	17.6173	27.6275	7.21383	0.0390798
Rv3050c	Rv3050c	transcriptional regulator, asnC-family	-0.934	-1.116	1.33363	1.5395	2.168	1.87146	1.03417	0	0.0702891	0	0	0	0.111769	0.491481
Rv3061c	fadE22	acyl-CoA dehydrogenase fadE22	-0.23416	-0.7726	-0.0801637	-0.180857	1.55383	2.23	1.5485	1.14444	3.57562	29.8071	34.5242	0	0	0
Rv3092c	Rv3092c	conserved membrane protein	-1.0136	-1.8728	-0.204313	-0.0359396	0.728022	-0.106688	1.03817	0.0308319	0	16.986	40.7065	2.18691	29.2715	0
Rv3094c	Rv3094c	conserved hypothetical protein	-2.0298	-1.7072	-0.136329	0.00190462	0.552314	0.680333	1.0425	0	0	24.7647	39.0397	1.52027	0.635213	0.0390798
Rv3103c	Rv3103c	hypothetical proline rich protein	-0.6262	-0.6988	-0.161882	-0.322646	0.0527836	0.207025	1.05882	0	0.773471	22.6855	4.21225	14.5672	0.424444	0.0390798
Rv3104c	Rv3104c	conserved membrane protein	-0.3086	-1.1978	0.468889	0.682625	0.262111	0.136396	1.0228	0.15615	0.773471	3.3679	0.0666069	0.764443	9.30021	0
Rv3107c	agpS	alkyldihydroxyacetonephosphate synthase agpS	-0.2758	-1.3	-0.338892	-0.60397	0.118112	0.398025	1.38017	1.52681	0.495957	13.1173	0.538361	9.88446	11.249	0
Rv3116	moeB2	molybdenum cofactor biosynthesis protein moeB2	-0.6342	-0.682	0.6315	1.05012	1.16742	1.97842	2.01467	0.0106519	1.71955	2.21959	0	0	0.0803909	0
Rv3120	Rv3120	conserved hypothetical protein	-1.4494	-0.749	0.536417	0.509993	1.472	0.332191	0.443	0	0.153395	0	0.538361	0	0.844682	1.2402
Rv3138	pflA	pyruvate formate lyase activating protein pflA	-0.529	-0.944	0.639563	0.745987	0.0937836	0.699255	1.59602	0	0.495957	0.692364	1.88847	14.5672	1.87601	0
Rv3140	fadE23	acyl-CoA dehydrogenase fadE23	-1.781	-2.2396	0.0332912	0.149185	1.1201	1.26555	1.29617	0	0	33.363	27.873	0	0.34968	0
Rv3157	nuoM	NADH dehydrogenase I chain M nuoM	-1.4064	-1.5978	-0.720708	-0.513062	0.371833	1.21867	0.239526	0	0	2.68968	5.3589	0.180939	0.111769	10.2998
Rv3163c	Rv3163c	conserved secreted protein	-0.3556	-1.273	0.0112602	-0.393297	0.297284	2.22123	1.12502	1.52681	0	41.9716	5.3589	14.5672	0	0.237413
Rv3193c	Rv3193c	conserved membrane protein	-0.7452	-0.9196	0.421292	0.710125	1.47417	0.536525	1.48237	0	0	1.17012	0.175732	0	1.87601	0
Rv3198c	uvrD2	ATP-dependent DNA helicase II uvrD2	-0.1888	-1.3312	0.167619	0.0167994	0.118112	0.569025	1.03234	16.742	0.0608004	11.2291	39.0397	9.88446	1.56532	0.0390798
Rv3211	rhlE	ATP-dependent RNA helicase rhlE	-0.9082	-1.3334	0.16	0.509625	1.07993	1.751	1.37367	0.0198003	0.347315	31.1901	11.6917	0	0	0
Rv3212	Rv3212	conserved alanine and valine rich protein	-1.4248	-1.437	0.320958	0.57175	0.890167	1.42633	0.951833	0	0	0.302589	1.88847	0	0	0
Rv3220c	Rv3220c	two component system sensor kinase	-0.6596	-0.6584	0.608163	-0.320638	1.38817	1.27383	0.275167	0.136641	0.0364408	0.302589	5.3589	0	0.521978	15.4429
Rv3226c	Rv3226c	conserved hypothetical protein	0.0142	-0.7056	0.772141	0.92425	0.572071	1.37183	0.720352	25.3457	4.87111	0	0	0.270283	0.22942	0.071375
Rv3228	Rv3228	conserved hypothetical protein	-0.8654	-1.1659	0.265467	-0.0541416	0.0992578	0.277025	1.06361	0.209738	0.773471	7.91846	39.0397	12.1857	5.39423	0.0390798
Rv3229c	desA3	linoleoyl-CoA desaturase	-1.9706	-1.6824	0.790625	0.943875	2.76839	2.23022	1.34796	0	0	0	0	0	0	0
Rv3234c	Rv3234c	conserved hypothetical protein	-0.9796	-1.4862	0.28575	0.519708	0.104591	0.345858	1.07818	0	0	2.21959	1.00039	12.1857	1.26652	0
Rv3241c	Rv3241c	conserved hypothetical protein	-0.9586	-1.1822	0.61125	0.846745	0.664433	0.293707	1.61592	0	0	0	0	0	2.52432	0
Rv3244c	lpqB	lipoprotein lpqB	-1.155	-1.7336	0.409238	0.35825	0.623167	0.930167	1.0295	0	0	0.830274	0.538361	0	0.34968	0
Rv3247c	tmk	thymidylate kinase tmk	-1.288	-1.9802	0.529875	0.346878	0.0353042	0.444358	1.00516	0.0198003	0	0.131943	8.20302	14.5672	1.26652	0.0390798
Rv3248c	sahH	adenosylhomocysteinase sahH	-2.195	-2.7196	1.1211	1.44788	1.9762	1.95006	1.889	0	0	0	0	0	0	0
Rv3249c	Rv3249c	transcriptional regulator, tetR-family	-1.6248	-1.7652	0.847625	0.74825	0.727833	1.16667	1.04483	0.0438163	0	0	0	0	0	0
Rv3254	Rv3254	conserved hypothetical protein	-0.3632	-0.7608	0.360232	0.134993	1.37588	0.8521	0.6375	1.52681	2.5417	0.23396	29.9115	0	0.424444	0.848953
Rv3255c	manA	mannose-6-phosphate isomerase manA	-1.2634	-1.9236	0.85315	1.00959	1.45499	0.2115	1.00539	0	0.0203035	0	0	0	20.3124	0.0390798
Rv3258c	Rv3258c	conserved hypothetical protein	-0.5344	-0.7516	1.46214	1.49975	2.15617	2.22	2.09183	0.136641	0.101481	0	0	0	0.0803909	0
Rv3272	Rv3272	conserved hypothetical protein	-0.8052	-1.561	1.10033	1.76475	2.83536	1.07086	2.65798	0	0	0	0	0	3.23087	0
Rv3273	Rv3273	transmembrane carbonic anhydrase	-0.7292	-1.8002	1.01381	1.50838	1.49792	1.80796	1.71383	0.0438163	0.259255	0.131943	0	0	0	0
Rv3280	accD5	propionyl-CoA carboxylase beta chain 5 accD5	-1.2206	-2.0574	-0.110426	0.589854	0.727617	0.224858	1.03443	0	0.0702891	28.454	0.175732	1.09481	0.22942	0
Rv3377c	Rv3377c	cyclase	-0.627811	-1.568	0.683544	1.17661	0.118112	0.272191	0.916333	0.0438163	1.13947	0.830274	0	9.88446	1.56532	0.0390798
Rv3382c	lytB1	lytB-related protein lytB1	-0.9942	-0.972	0.529667	0.918312	1.32016	2.11318	0.183516	0.0198003	0.495957	0.131943	0	0	0.111769	14.1131
Rv3396c	guaA	GMP synthase guaA	-0.5866	-1.0614	0.326525	0.096025	-0.0437164	0.870167	1.025	0	0.495957	13.1173	29.9115	27.6275	0.844682	0.0390798
Rv3407	Rv3407	conserved hypothetical protein	-0.5456	-0.6134	0.341125	0.509	0.739833	1.24833	0.941167	0.090104	0.495957	1.89534	0.771414	0	0.206695	0.0390798
Rv3408	Rv3408	conserved hypothetical protein	-0.648	-1.2054	0.048125	0.128887	0.988667	1.00217	0.130667	0.0198003	0	35.9258	22.1645	0	0.111769	17.346
Rv3419c	gcp	O-sialoglycoprotein endopeptidase gcp	-1.3728	-1.2556	-0.508625	-0.67775	1.072	0.764167	0.140074	0	0.0702891	1.89534	0.12066	0	0.521978	17.346
Rv3420c	rimI	ribosomal-protein-alanine acetyltransferase rimI	-0.8834	-0.60626	-0.20375	-0.17725	0.415833	1.2655	1.2855	0.0308319	0.0364408	20.7593	31.4892	0.413258	0	0
Rv3423c	alr	alanine racemase alr	-0.7702	-1.7748	0.353761	0.730114	1.9799	2.54217	1.30058	0.0198003	0	1.40783	0.355923	0	0	0
Rv3430c	Rv3430c	transposase	-0.0398	-0.6228	0.382887	0.837125	0.000194444	0.906445	1.46374	22.5603	1.71955	0.444983	0.538361	14.5672	0.844682	0
Rv3441c	mrsA	phospho-sugar mutase mrsA	-0.8968	-1.4898	0.98955	1.04028	-0.473833	-0.6805	-0.0665556	0	0.0702891	0	0	1.09481	0.206695	23.7582
Rv3450c	Rv3450c	conserved membrane protein	-0.2054	-0.693925	-0.3715	-0.332994	0.34395	1.03223	0.210458	6.31592	0.495957	1.89534	1.88847	1.52027	0	12.3548
Rv3464	rmlB	dTDP-glucose 4,6-dehydratase rmlB	-1.2438	-1.369	1.32476	1.43675	2.03604	2.08808	1.14987	0	0.0364408	0	0	0	0.0803909	0
Rv3465	rmlC	dTDP-4-dehydrorhamnose 3,5-epimerase rmlC	-2.0868	-1.7804	1.40475	1.491	0.29525	1.718	0.806852	0	0	0	0	1.09481	0.160032	0.0390798
Rv3485c	Rv3485c	short-chain type dehydrogenase/reductase	-1.8512	-2.1372	0.458855	0.416628	1.06031	0.0292333	-0.00116667	0	0	2.68968	0.538361	0	20.3124	24.5014
Rv3489	Rv3489	hypothetical protein	-2.0084	-1.5144	0.0167917	0.500875	0.471333	1.58417	1.45083	0	0	41.2276	9.64797	2.18691	0.152649	0
Rv3519	Rv3519	hypothetical protein	-0.233	-0.929	0.319875	0.81975	0.118112	1.47145	1.393	6.31592	0.347315	7.91846	0	9.88446	0	0.071375
Rv3576	lppH	lipoprotein lppH	-2.44047	-2.12842	0.085575	0.182484	0.68345	1.84592	1.29677	0.0198003	0	29.8071	26.1741	3.04614	0	0
Rv3592	TB11.2	conserved hypothetical protein	-1.6188	-1.5302	-0.01725	0.6745	0.295924	0.943222	1.23446	0	0	42.945	0.111065	3.04614	0.152649	0
Rv3596c	clpC1	ATP-dependent protease ATP-binding subunit clpC1	-1.2028	-0.998	1.18962	1.84413	1.81383	1.70151	1.615	0	0	0	0	0	0.521978	0
Rv3604c	Rv3604c	conserved alanine, arginine and proline rich membrane protein	-1.5968	-1.7708	-0.300341	-0.287125	0.380358	0.545691	1.12506	0	0	28.454	8.20302	0.270283	1.56532	0.0390798
Rv3609c	folE	GTP cyclohydrolase I folE	0.3016	-0.794	-0.104328	0.188625	1.28467	2.0365	1.27067	13.0935	0.773471	29.8071	17.6173	0	0	0
Rv3610c	ftsH	membrane-bound ell division protein ftsH	-0.132	-0.7862	0.11375	0.379125	0.696722	1.78693	1.64892	16.742	3.57562	31.1901	9.64797	0.180939	0.111769	0
Rv3645	Rv3645	conserved membrane protein	-1.5692	-1.759	0.240071	0.490125	0.242424	0.0948735	1.19599	0	0.0364408	14.9295	1.00039	3.04614	4.10831	0
Rv3657c	Rv3657c	conserved alanine rich membrane protein	-0.8038	-0.658	0.432812	0.0758028	0.405117	1.95972	1.454	0.0106519	1.13947	0.302589	27.873	3.04614	0	0
Rv3682	ponA2	bifunctional membrane-associated penicillin-binding protein 1A/1B ponA2	-1.8316	-1.9736	0.730719	0.890464	1.63294	0.510477	0.356761	0	0	0	0	0	5.39423	4.08595
Rv3689	Rv3689	conserved membrane protein	-0.182	-1.4704	0.0366269	0.0660252	0.117258	0.241858	1.04547	6.31592	0.153395	31.1901	29.9115	9.88446	0.22942	0
Rv3705c	Rv3705c	conserved hypothetical protein	-0.8176	-1.0512	0.276331	1.00719	0.118112	0.184025	0.321889	0	0.0608004	11.2291	0	9.88446	0.0803909	4.08595
Rv3759c	proX	osmoprotectant proX	-1.1242	-1.752	0.511487	0.362016	0.268638	1.02807	1.1064	0.0106519	0.0702891	0	9.64797	3.04614	0.206695	0
Rv3774	echA21	enoyl-CoA hydratase echA21	-0.8302	-1.9052	-0.155292	0.113219	0.0919245	0.164442	1.10543	0.0198003	0.0203035	26.5037	27.873	14.197	0.160032	0.0390798
Rv3781	rfbE	O-antigen/lipopolysaccharide transport ATP-binding protein ABC transporter rfbE	-1.4092	-1.61021	-0.173607	0.137608	0.106117	0.686289	1.10064	0	0	20.7593	31.4892	12.1857	1.01133	0
Rv3782	glfT1	L-rhamnosyltransferase	-1.9252	-1.7422	0.342	0.944222	0.503667	1.16683	1.382	0	0	13.1173	1.00039	2.18691	0.286356	0
Rv3791	Rv3791	short-chain type dehydrogenase/reductase	-0.965	-1.1448	0.261632	0.281251	0.118112	0.317691	1.0821	0	0.0364408	9.57804	13.6569	9.88446	4.10831	0
Rv3794	embA	membrane indolylacetylinositol arabinosyltransferase embA	-1.3628	-1.836	-0.160517	0.442423	0.138424	0.24604	1.0475	0	0.153395	20.7593	11.6917	9.88446	1.87601	0
Rv3800c	pks13	polyketide synthase pks13	-0.8728	-1.5244	0.469673	0.6355	1.41833	2.34248	1.77283	0.0198003	0	0.692364	3.37847	0	0	0
Rv3854c	ethA	monooxygenase ethA	-0.2326	-0.8466	0.8755	1.01225	0.987667	1.14167	0.53325	16.742	0.495957	0	0	0	0.111769	0.330364
Rv3866	Rv3866	conserved hypothetical protein	-0.2124	-0.7912	0.585902	0.935125	0.917833	1.00933	0.7235	8.52747	1.71955	0.131943	0	0	0.152649	0.330364
Rv3868	Rv3868	conserved hypothetical protein	-0.5332	-0.8932	0.871625	1.2	0.762167	1.17675	0.554083	0.368873	0	0	0	0.0746586	0.206695	0.330364
Rv3874	esxB	10 kda culture filtrate antigen esxB	-0.5618	-1.0266	0.357125	0.882	1.56083	1.79117	0.886	3.37732	0.773471	6.40245	0.0666069	0	0.152649	0.0390798
Rv3875	esxA	6 kda early secretory antigenic target esxA	-1.8768	-1.399	0.33875	0.793125	1.04383	1.85183	0.418	0	0	9.57804	0.111065	0	0.206695	4.08595
Rv3876	Rv3876	conserved alanine and proline rich protein	-1.2224	-0.9488	0.180763	0.456375	0.826646	0.803217	1.13258	0	0	18.6331	0.538361	0	0.34968	0
Rv3921c	Rv3921c	conserved membrane protein	-1.8102	-0.6725	1.39837	0.80675	0.982422	-0.0798333	0.520167	0	0.203951	0	0	0.106298	29.2715	5.4734
Abbreviations: Hyp = hypoxia, RA = reaeration, d = days, h = hours
Hypoxia-repressed genes defined as those repressed >30% (Numerator <-0.59) at 7 days of hypoxia, q<5
Table includes genes upregulated >100% (Numerator >1) at any timepoint of reaeration, q<0.5
